# Supplementary material for: Understanding the Impact of Chronic Non-Cancer Pain on Daily Life from a Gender Perspective Using the PAIN_Integral Scale©
Source: MDPI journal article supplement (doi:10.3390/healthcare12060695), 2024-03-20
Supplement: s1 [file s1]

**Title: Understanding the Impact of Chronic Non-Cancer Pain on Daily Life from a Gender  
Perspective Using the PAIN\_Integral Scale<sup>©</sup>**

Table S1. STROBE Statement—Checklist of items that should be included in reports of *cross-sectional studies*

|                              | Item<br>Check                       | Recommendation                                                                                                                                                                                                                                   |
|------------------------------|-------------------------------------|--------------------------------------------------------------------------------------------------------------------------------------------------------------------------------------------------------------------------------------------------|
| <b>Title and abstract</b>    | <input checked="" type="checkbox"/> | <div>(a) Indicate the study’s design with a commonly used term in the title or the abstract (abstract P.1)</div> <div>(b) Provide in the abstract an informative and balanced summary of what was done and what was found (abstract P.1-2)</div> |
| <b>Introduction</b>          |                                     |                                                                                                                                                                                                                                                  |
| Background/rationale         | <input checked="" type="checkbox"/> | Explain the scientific background and rationale for the investigation being reported (P.3-4)                                                                                                                                                     |
| Objectives                   | <input checked="" type="checkbox"/> | State specific objectives, including any prespecified hypotheses(P.5)                                                                                                                                                                            |
| <b>Methods</b>               |                                     |                                                                                                                                                                                                                                                  |
| Study design                 | <input checked="" type="checkbox"/> | Present key elements of study design early in the paper (P.5)                                                                                                                                                                                    |
| Setting                      | <input checked="" type="checkbox"/> | Describe the setting, locations, and relevant dates, including periods of recruitment, exposure, follow-up, and data collection (P.5-6)                                                                                                          |
| Participants                 | <input checked="" type="checkbox"/> | (a) Give the eligibility criteria, and the sources and methods of selection of participants (P.5-6)                                                                                                                                              |
| Variables                    | <input checked="" type="checkbox"/> | Clearly define all outcomes, exposures, predictors, potential confounders, and effect modifiers. Give diagnostic criteria, if applicable (P.6)                                                                                                   |
| Data sources/<br>measurement | <input checked="" type="checkbox"/> | For each variable of interest, give sources of data and details of methods of assessment (measurement). Describe comparability of assessment methods if there is more than one group (P.7-8)                                                     |
| Bias                         | NA                                  | Describe any efforts to address potential sources of bias (NA)                                                                                                                                                                                   |
| Study size                   | NA                                  | Explain how the study size was arrived at (5-6)                                                                                                                                                                                                  |
| Quantitative variables       | <input checked="" type="checkbox"/> | Explain how quantitative variables were handled in the analyses. (5-7) If applicable, describe which groupings were chosen and why (NA)                                                                                                          |
| Statistical methods          | <input checked="" type="checkbox"/> | (a) Describe all statistical methods, including those used to control for confounding (5-7)                                                                                                                                                      |
|                              |                                     | (b) Describe any methods used to examine subgroups and interactions (NA)                                                                                                                                                                         |
|                              |                                     | (c) Explain how missing data were addressed(NA)                                                                                                                                                                                                  |
|                              |                                     | (d) If applicable, describe analytical methods taking account of sampling strategy (NA)                                                                                                                                                          |
|                              |                                     | (e) Describe any sensitivity analyses(NA)                                                                                                                                                                                                        |
| <b>Results</b>               |                                     |                                                                                                                                                                                                                                                  |
| Participants                 | <input checked="" type="checkbox"/> | (a) Report numbers of individuals at each stage of study—eg numbers potentially eligible, examined for eligibility, confirmed eligible, included in the study, completing follow-up, and analysed(P.7-9)                                         |
|                              |                                     | (b) Give reasons for non-participation at each stage (NA)                                                                                                                                                                                        |
|                              |                                     | (c) Consider use of a flow diagram(NA)                                                                                                                                                                                                           |
| Descriptive data             | <input checked="" type="checkbox"/> | (a) Give characteristics of study participants (eg demographic, clinical, social) and information on exposures and potential confounders (P.7)                                                                                                   |
|                              |                                     | (b) Indicate number of participants with missing data for each variable of interest (NA)                                                                                                                                                         |

|                          |                                     |                                                                                                                                                                                                                                                                                                                                                                                                                                                |
|--------------------------|-------------------------------------|------------------------------------------------------------------------------------------------------------------------------------------------------------------------------------------------------------------------------------------------------------------------------------------------------------------------------------------------------------------------------------------------------------------------------------------------|
| Outcome data             | NA                                  | Report numbers of outcome events or summary measures (NA)                                                                                                                                                                                                                                                                                                                                                                                      |
| Main results             | <input checked="" type="checkbox"/> | <p>(a) Give unadjusted estimates and, if applicable, confounder-adjusted estimates and their precision (eg, 95% confidence interval). Make clear which confounders were adjusted for and why they were included (P.7-9)</p> <p>(b) Report category boundaries when continuous variables were categorized (NA)</p> <p>(c) If relevant, consider translating estimates of relative risk into absolute risk for a meaningful time period (NA)</p> |
| Other analyses           | NA                                  | Report other analyses done—eg analyses of subgroups and interactions, and sensitivity analyses (NA)                                                                                                                                                                                                                                                                                                                                            |
| <b>Discussion</b>        |                                     |                                                                                                                                                                                                                                                                                                                                                                                                                                                |
| Key results              | <input checked="" type="checkbox"/> | Summarise key results with reference to study objectives (P.10-14)                                                                                                                                                                                                                                                                                                                                                                             |
| Limitations              | <input checked="" type="checkbox"/> | Discuss limitations of the study, taking into account sources of potential bias or imprecision. Discuss both direction and magnitude of any potential bias (P.13)                                                                                                                                                                                                                                                                              |
| Interpretation           | <input checked="" type="checkbox"/> | Give a cautious overall interpretation of results considering objectives, limitations, multiplicity of analyses, results from similar studies, and other relevant evidence (P.10-14)                                                                                                                                                                                                                                                           |
| Generalisability         | <input checked="" type="checkbox"/> | Discuss the generalisability (external validity) of the study results (P.10-14)                                                                                                                                                                                                                                                                                                                                                                |
| <b>Other information</b> |                                     |                                                                                                                                                                                                                                                                                                                                                                                                                                                |
| Funding                  | <input checked="" type="checkbox"/> | Give the source of funding and the role of the funders for the present study and, if applicable, for the original study on which the present article is based (Title page)                                                                                                                                                                                                                                                                     |

\*NA=Not applicable.
